# Supplementary material for: Sensory and Chemical Drivers of Wine Consumers’ Preference for a New Shiraz Wine Product Containing Ganoderma lucidum Extract as a Novel Ingredient
Source: PubMed Central journal article supplement (PMC7074515; doi:10.3390/foods9020224), 2020-02-20
Supplement: foods-09-00224-s001.pdf [file foods-09-00224-s001.pdf]

## SUPPLEMENTARY INFORMATION FOR

### Sensory and chemical drivers of wine consumers' preference for a new Shiraz wine product containing *Ganoderma lucidum* extract as a novel ingredient

Anh N.H. Nguyen <sup>1</sup>, Trent E. Johnson <sup>1</sup>, David W. Jeffery <sup>1,2</sup>, Dimitra L. Capone <sup>1,2</sup>, Lukas Danner <sup>1</sup>, and Susan E.P. Bastian <sup>1,2,\*</sup>

<sup>1</sup> Department of Wine and Food Science, School of Agriculture, Food and Wine, The University of Adelaide, PMB 1, Glen Osmond, South Australia, 5064, Australia.

<sup>2</sup> Australian Research Council Training Centre for Innovative Wine Production, The University of Adelaide, PMB 1, Glen Osmond, South Australia, 5064, Australia.

\* Corresponding author sue.bastian@adelaide.edu.au; tel: +61 883136647

#### TABLE OF CONTENTS

|                                                                                                                                                | Page |
|------------------------------------------------------------------------------------------------------------------------------------------------|------|
| <b>Table S1.</b> Mean intensity ratings of sensory attributes that significantly differentiated six <i>GL</i> wines from RATA sensory testing. | S2   |
| <b>Table S2.</b> Basic chemical composition of the <i>GL</i> wines.                                                                            | S3   |

**Table S1.** Mean intensity ratings of sensory attributes that significantly differentiated six *GL* wines from RATA sensory testing.

| Sensory attributes | CONTROL  | PRE 1   | PRE 2    | PRE 4    | POST 1   | POST 4  |
|--------------------|----------|---------|----------|----------|----------|---------|
| Ap-red             | 4.31 a   | 3.75 c  | 4.11 ab  | 3.72 c   | 3.91 bc  | 3.91 bc |
| Ap-brown           | 2.11 d   | 2.35 cd | 2.60 bc  | 3.68 a   | 2.91 b   | 3.91 a  |
| A-red fruit        | 3.86 a   | 3.45 ab | 3.43 ab  | 2.57 c   | 2.95 bc  | 3.05 bc |
| A-dried fruit      | 1.55 c   | 1.54 c  | 1.98 abc | 2.20 ab  | 1.75 bc  | 2.34 a  |
| A-confectionery    | 2.83 a   | 2.89 a  | 2.65 ab  | 2.25 b   | 2.42 ab  | 2.15 b  |
| A-cooked vegetable | 0.57 ab  | 0.25 c  | 0.34 bc  | 0.78 a   | 0.20 c   | 0.80 a  |
| A-earthy           | 0.77 bcd | 0.62 d  | 1.05 abc | 1.12 ab  | 0.75 cd  | 1.28 a  |
| A-floral           | 2.32 ab  | 2.51 a  | 1.88 bc  | 1.75 c   | 1.94 bc  | 1.88 bc |
| A-mushroom         | 0.52 bc  | 0.42 c  | 0.78 ab  | 0.57 abc | 0.51 bc  | 0.89 a  |
| A-leather          | 0.49 bc  | 0.28 c  | 0.74 ab  | 0.71 ab  | 0.51 bc  | 0.85 a  |
| A-pepper           | 0.74 a   | 0.31 b  | 0.68 a   | 0.65 a   | 0.34 b   | 0.66 a  |
| A-savory           | 0.68 bc  | 0.54 c  | 1.09 b   | 0.97 b   | 0.82 bc  | 1.60 a  |
| A-toasty           | 0.78 b   | 0.80 b  | 0.94 b   | 1.37 a   | 0.77 b   | 1.34 a  |
| A-woody            | 0.85 bc  | 0.60 c  | 1.06 ab  | 1.03 ab  | 0.77 bc  | 1.28 a  |
| A-tobacco          | 0.55 b   | 0.68 b  | 0.45 b   | 0.72 b   | 0.57 b   | 1.05 a  |
| T-bitter           | 3.05 b   | 3.17 b  | 3.40 ab  | 3.77 a   | 3.25 b   | 3.69 a  |
| F-red fruit        | 3.55 a   | 3.62 a  | 3.25 ab  | 2.77 c   | 3.06 bc  | 2.91 bc |
| F-dried fruit      | 1.32 c   | 1.29 bc | 1.72 a   | 1.97 c   | 1.54 abc | 2.15 ab |
| F-jammy            | 1.97 a   | 1.38 bc | 1.78 abc | 1.37 c   | 1.85 ab  | 1.98 a  |
| F-cooked vegetable | 0.46 ab  | 0.25 b  | 0.35 b   | 0.49 ab  | 0.22 b   | 0.71 a  |
| F-earthy           | 0.68 bc  | 0.49 c  | 0.97 ab  | 0.71 bc  | 0.82 bc  | 1.15 a  |
| F-floral           | 2.23 a   | 1.80 ab | 2.00 ab  | 1.14 c   | 1.54 bc  | 1.65 b  |
| F-mushroom         | 0.31 c   | 0.37 bc | 0.65 ab  | 0.58 bc  | 0.29 c   | 0.92 a  |
| F-green capsicum   | 0.72 a   | 0.38 b  | 0.63 ab  | 0.65 ab  | 0.35 b   | 0.72 a  |
| F-pepper           | 0.82 abc | 0.42 d  | 0.94 ab  | 0.63 bcd | 0.55 cd  | 1.00 a  |
| F-savory           | 0.71 b   | 0.65 b  | 1.17 a   | 1.29 a   | 0.69 b   | 1.32 a  |
| F-spice            | 1.46 abc | 1.34 bc | 1.83 a   | 1.31 bc  | 1.08 c   | 1.75 ab |
| M-astringency      | 2.57 ab  | 2.35 b  | 2.85 a   | 2.91 a   | 2.68 ab  | 2.88 a  |
| M-smoothness       | 3.75 a   | 3.40 ab | 3.40 ab  | 3.03 b   | 3.18 b   | 3.43 ab |
| M-roughness        | 2.25 bc  | 2.14 c  | 2.60 ab  | 2.72 a   | 2.65 a   | 2.69 a  |
| FL-non-fruit       | 3.72 ab  | 3.31 c  | 3.60 abc | 3.89 a   | 3.34 bc  | 3.72 ab |

Means within a row followed by different letters are significantly different. Data were collected and analyzed by using mixed model with Fisher's LSD post-hoc tests, with a significance level of  $p < 0.05$ . Prefixes: A- = aroma attribute; T- = taste; F- = flavor attribute; M- = mouth-feel, Ap- = appearance, FL- = aftertaste (fruit and non-fruit) intensity of different wine treatments. Prefixes PRE = *GL* extracts added prior to fermentation (PRE 1, PRE 2 and PRE 4), POST = *GL* extracts added after fermentation process (POST 1 and POST 4).

**Table S2.** Basic chemical composition of the *GL* wines

| Treatment samples | pH      | TA (g/L) | Ethanol (% v/v) | VA (g/L) | Free SO <sub>2</sub> (mg/L) | Total SO <sub>2</sub> (mg/L) | Color (AU) | Sugar (g/L) |
|-------------------|---------|----------|-----------------|----------|-----------------------------|------------------------------|------------|-------------|
| CONTROL           | 3.91 cd | 4.56 ab  | 12.75 c         | 0.25 c   | 48.53 c                     | 123.73 b                     | 10.54 f    | 0.61 f      |
| PRE 1             | 3.90 d  | 4.21 d   | 12.3 d          | 0.25 c   | 51.73 b                     | 117.33 c                     | 11.67 e    | 0.74 e      |
| PRE 2             | 3.92 c  | 4.29 cd  | 13.16 b         | 0.26 c   | 52.8 b                      | 125.87 b                     | 11.83 d    | 0.98 d      |
| PRE 4             | 3.96 a  | 4.48 b   | 12.76 c         | 0.29 b   | 58.66 a                     | 133.87 a                     | 12.56 c    | 1.56 b      |
| POST 1            | 3.94 b  | 4.63 a   | 13.83 a         | 0.34 a   | 36.26 d                     | 90.67 e                      | 12.59 b    | 1.32 c      |
| POST 4            | 3.97 a  | 4.35 c   | 13.48 ab        | 0.3 b    | 36.26 d                     | 96.53 d                      | 14.62 a    | 2.96 a      |

Data are means of triplicate measurements, except VA measurements were conducted in duplicate. Means within a column followed by different letters are significantly different (one-way ANOVA, Tukey's HSD, post-hoc,  $p < 0.05$ ). Abbreviation: Titratable acidity (TA), volatile acidity (VA).
